# Supplementary material for: Psychiatric comorbidities in epilepsy: population co-occurrence, genetic correlations and causal effects
Source: PubMed Central journal article supplement (PMC11369844; doi:10.1136/gpsych-2023-101201), 2024-01-30
Supplement: gpsych-2023-101201supp001.pdf [file gpsych-2023-101201supp001.pdf]

## Supplement

|                                                                                                             |           |
|-------------------------------------------------------------------------------------------------------------|-----------|
| Supplemental Figure 1. Overview of the methodology.....                                                     | 2         |
| Supplemental Table 1. International Classification of Diseases codes. ....                                  | 3         |
| <b>Extended observational results .....</b>                                                                 | <b>4</b>  |
| Supplemental Figure 2. The unadjusted population-wide co-occurrence. ....                                   | 5         |
| Supplemental Figure 3. The sex-stratified population-wide co-occurrence.....                                | 6         |
| Supplemental Figure 4. The population-wide co-occurrence stratified by type of epilepsy. ....               | 7         |
| Supplemental Figure 5. The population-wide co-occurrence stratified by birth cohorts. ....                  | 8         |
| <b>Extended genomic results .....</b>                                                                       | <b>9</b>  |
| Supplemental Table 3. Extended results from the LDSC and MR analyses of epilepsy (broadly classified). .... | 9         |
| Supplemental Table 4. Extended results from the LDSC and MR analyses of focal epilepsy.....                 | 10        |
| Supplemental Table 5. Extended results from the LDSC and MR analyses of generalized epilepsy. ....          | 11        |
| <b>eMethods - Mendelian sensitivity analysis .....</b>                                                      | <b>12</b> |
| Supplemental Figure 6. Volcano plot of the MR-Egger intercept.....                                          | 13        |
| Supplemental Table 6. Egger intercepts for all Mendelian analyses.....                                      | 14        |
| Supplemental Table 7. Mendelian sensitivity analyses.....                                                   | 15        |
| <b>Supplement References .....</b>                                                                          | <b>18</b> |

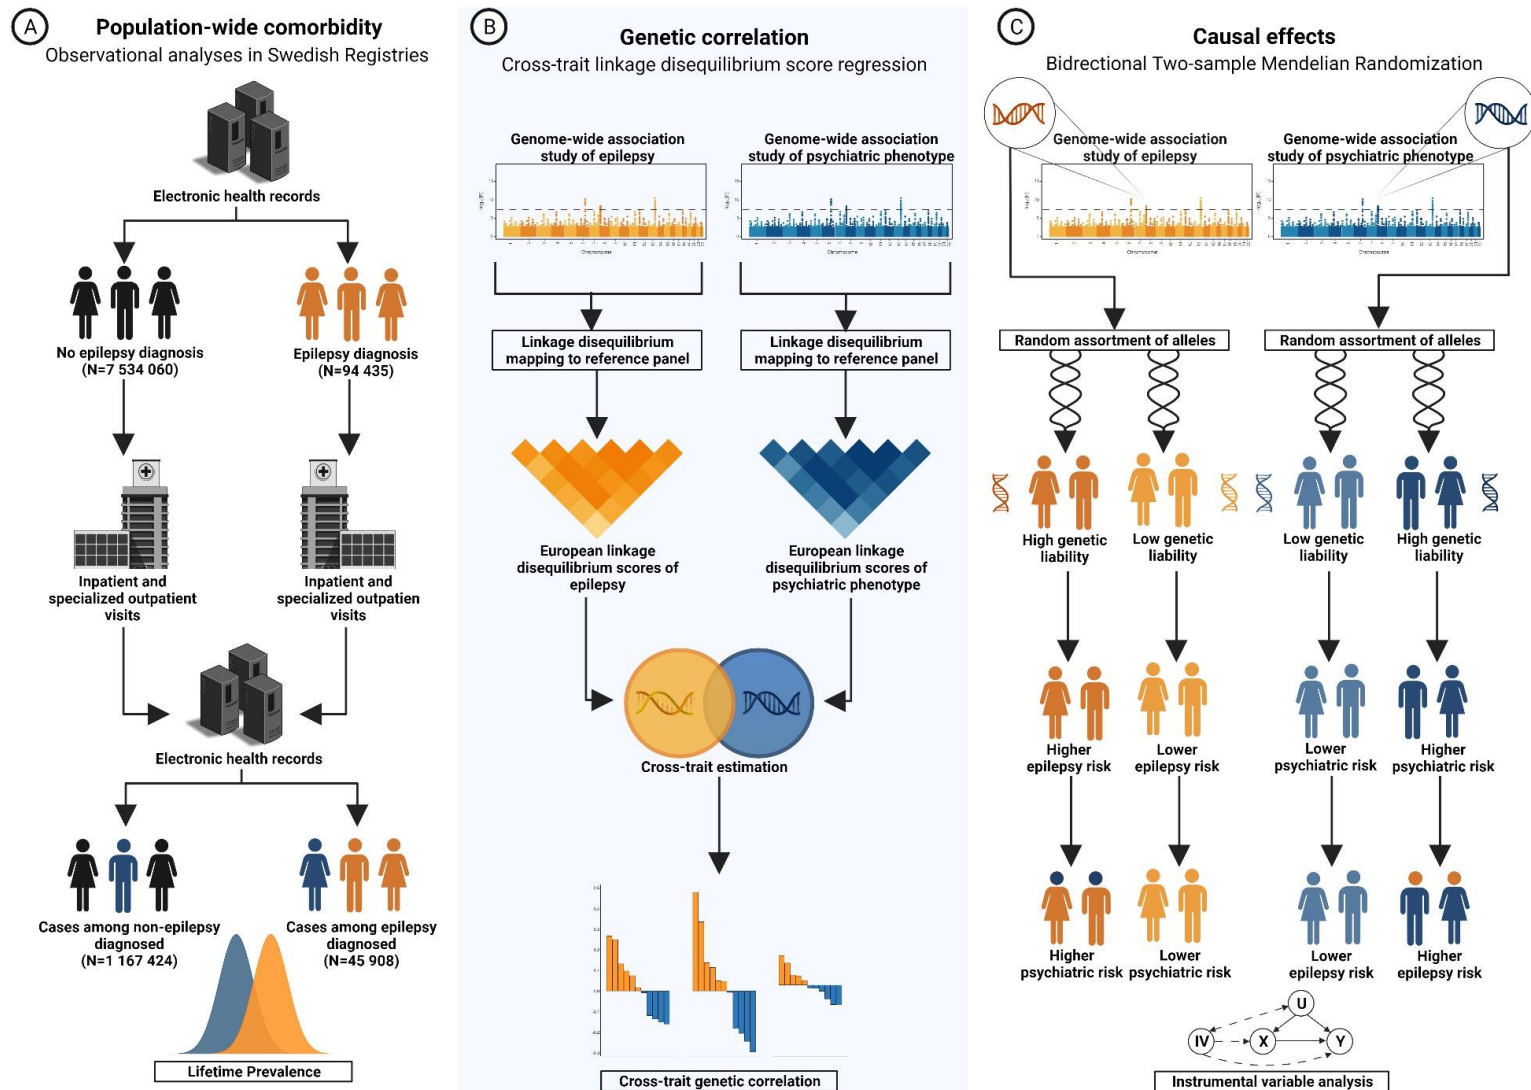

**Supplemental Figure 1. Overview of the methodology employed to characterize the comorbidities of psychiatric conditions in individuals with epilepsy (A), outline the genetic correlation between epilepsy and psychiatric conditions (B) and examine the possibility of bidirectional relationship between epilepsy and psychiatric conditions (C). For a detailed description of the approaches and related assumptions see the Method section.**

**Supplemental Table 1. International Classification of Diseases codes used to identify conditions in the Swedish health registries.**

| Condition                                | ICD-10                                   | ICD-9                             | ICD-8                                         |
|------------------------------------------|------------------------------------------|-----------------------------------|-----------------------------------------------|
| Any psychiatric diagnosis                | F00-F99                                  | 290-319                           | 290-319                                       |
| Attention-deficit/hyperactivity disorder | F90                                      | 314                               | 308.3                                         |
| Anorexia Nervosa                         | F50.0, F50.1                             | 307.1                             | 306.5                                         |
| Anxiety Disorder                         | F40-F48                                  | 300.0, 300.2, 308, 309            | 300.0-300.2, 300.5-300.9                      |
| Autism                                   | F84                                      | 299                               | 299.99                                        |
| Bipolar disorder                         | F30, F31, F34.0, F25.0                   | 296.0, 296.2, 296.4, 296.8, 296.9 | 296.1, 296.3, 296.8                           |
| Depression                               | F32-F39                                  | 296.1, 298.0, 300.4, 311          | 298.0, 300.4                                  |
| Epilepsy <sup>1,2</sup>                  | G40                                      | 345J-345P, 345W, 345X             | 345.0-345.3, 345.9                            |
| <i>Focal</i>                             | G40.0, G40.1, G40.2                      | 345M, 345N                        | 345.30, 345.31, 345.38, 345.39                |
| <i>Generalized</i>                       | G40.3                                    | 345J, 345K                        | 345.00, 345.09, 345.10, 345.11                |
| <i>Other and unspecified</i>             | G40.4, G40.5, G40.6, G40.7, G40.8, G40.9 | 345L, 345P, 345W, 345X            | 345.18, 345.19, 345.39, 345.32, 345.33, 345.9 |
| Intellectual Disability                  | F70-F79                                  | 317-319                           | 310-315                                       |
| Obsessive-compulsive disorder            | F42                                      | 300.3                             | 300.3, 301.4                                  |
| Schizophrenia                            | F20-F29                                  | 295.0, 295.4, 295.6, 295.8, 295.9 | 295.0, 295.4, 295.6, 295.8, 295.9             |
| Suicide attempts                         | X60-X84                                  | 950-958                           | 950-958                                       |
| Tic-disorders (Tourette Syndrome)        | F95                                      | 307.2                             | 306.2                                         |

<sup>1</sup>Individuals who only received a three-character ICD code were classified as a distinct category in subtype analysis (never characterized).

<sup>2</sup>We were unable to classify 259 individuals who were discharged with both focal and generalized ICD codes on their most recent visit, these were retained these individuals in the “never characterized” group.

## Extended observational results

| <b>Supplemental Table 2. Observational analysis<sup>1</sup> in Swedish health-care registries of epilepsy and psychiatric conditions.</b> |                           |                                         |                     |                                  |                                     |                              |                                 |                                              |
|-------------------------------------------------------------------------------------------------------------------------------------------|---------------------------|-----------------------------------------|---------------------|----------------------------------|-------------------------------------|------------------------------|---------------------------------|----------------------------------------------|
| Phenotype                                                                                                                                 | No Epilepsy (N=7 534 060) |                                         | Epilepsy (N=94 435) |                                  |                                     |                              |                                 |                                              |
|                                                                                                                                           | N cases                   | Prevalence <sup>2</sup> (%)<br>(95% CI) | N cases             | Crude prevalence (%)<br>(95% CI) | Adjusted prevalence (%)<br>(95% CI) | Crude Odds ratio<br>(95% CI) | Adjusted Odds ratio<br>(95% CI) | Percent attenuation <sup>3</sup><br>(95% CI) |
| Any psychiatric diagnosis                                                                                                                 | 1 167 424                 | 15.5 (15.5-15.5)                        | 45 908              | 48.6 (48.3-48.9)                 | 44.1 (43.8-44.4)                    | 5.16 (5.09-5.23)             | 4.60 (4.54-4.66)                | 12.2 (11.8-12.5)                             |
| Anxiety                                                                                                                                   | 554 058                   | 7.4 (7.4-7.4)                           | 17 276              | 18.3 (18-18.5)                   | 16 (15.7-16.2)                      | 2.82 (2.77-2.87)             | 2.48 (2.43-2.52)                | 13.9 (13.5-14.4)                             |
| Depression                                                                                                                                | 390 493                   | 5.2 (5.2-5.2)                           | 12 642              | 13.4 (13.2-13.6)                 | 11.4 (11.2-11.6)                    | 2.83 (2.77-2.88)             | 2.41 (2.36-2.45)                | 17.4 (17-17.9)                               |
| Intellectual disability                                                                                                                   | 38 376                    | 0.5 (0.5-0.5)                           | 13 471              | 14.3 (14-14.5)                   | 11.1 (10.9-11.3)                    | 32.5 (31.83-33.18)           | 27.51 (26.9-28.12)              | 18.2 (17.1-19.2)                             |
| Attention-deficit/hyperactivity disorder                                                                                                  | 168 012                   | 2.2 (2.2-2.2)                           | 6 455               | 6.8 (6.7-7)                      | 5.8 (5.7-6)                         | 3.22 (3.13-3.3)              | 2.82 (2.75-2.90)                | 14.1 (13.3-14.9)                             |
| Suicide attempts                                                                                                                          | 126 801                   | 1.7 (1.7-1.7)                           | 6 729               | 7.1 (7-7.3)                      | 5.8 (5.7-6)                         | 4.48 (4.37-4.6)              | 3.69 (3.70-3.79)                | 21.5 (20.9-22.1)                             |
| Autism                                                                                                                                    | 75 575                    | 1.0 (1.0-1.0)                           | 6 743               | 7.1 (7-7.3)                      | 5.5 (5.4-5.6)                       | 7.59 (7.4-7.79)              | 6.09 (5.93-6.26)                | 24.5 (23.5-25.5)                             |
| Schizophrenia                                                                                                                             | 60 753                    | 0.8 (0.8-0.8)                           | 3 370               | 3.6 (3.5-3.7)                    | 2.5 (2.4-2.5)                       | 4.55 (4.39-4.72)             | 3.15 (3.03-3.26)                | 44.7 (43.5-46)                               |
| Bipolar disorder                                                                                                                          | 64 165                    | 0.9 (0.8-0.9)                           | 2 287               | 2.4 (2.3-2.5)                    | 1.9 (1.8-1.9)                       | 2.89 (2.77-3.01)             | 2.21 (2.12-2.31)                | 30.7 (29.8-31.5)                             |
| Obsessive-compulsive disorder                                                                                                             | 40 491                    | 0.5 (0.5-0.5)                           | 1 335               | 1.4 (1.3-1.5)                    | 1.1 (1-1.1)                         | 2.65 (2.51-2.8)              | 2.02 (1.91-2.13)                | 31.4 (30.4-32.4)                             |
| Anorexia Nervosa                                                                                                                          | 23 254                    | 0.3 (0.3-0.3)                           | 725                 | 0.8 (0.7-0.8)                    | 0.7 (0.6-0.7)                       | 2.5 (2.32-2.69)              | 2.14 (1.99-2.31)                | 16.7 (15.5-18)                               |
| Tic-disorders (Tourette Syndrome)                                                                                                         | 13 874                    | 0.2 (0.2-0.2)                           | 654                 | 0.7 (0.6-0.7)                    | 0.6 (0.6-0.7)                       | 3.78 (3.49-4.09)             | 3.44 (3.18-3.73)                | 9.8 (8.5-11.1)                               |

<sup>2</sup>Estimates are obtained from logistic regression(s). Where indicated, estimates are adjusted for birth year, sex, highest achieved disposable income, and immigration status.

<sup>2</sup>We omit the adjusted prevalence among those without epilepsy as it did not differ before the first decimal.

<sup>3</sup>The percent of attenuation comparing the crude odds ratio to the adjusted odds ratio.

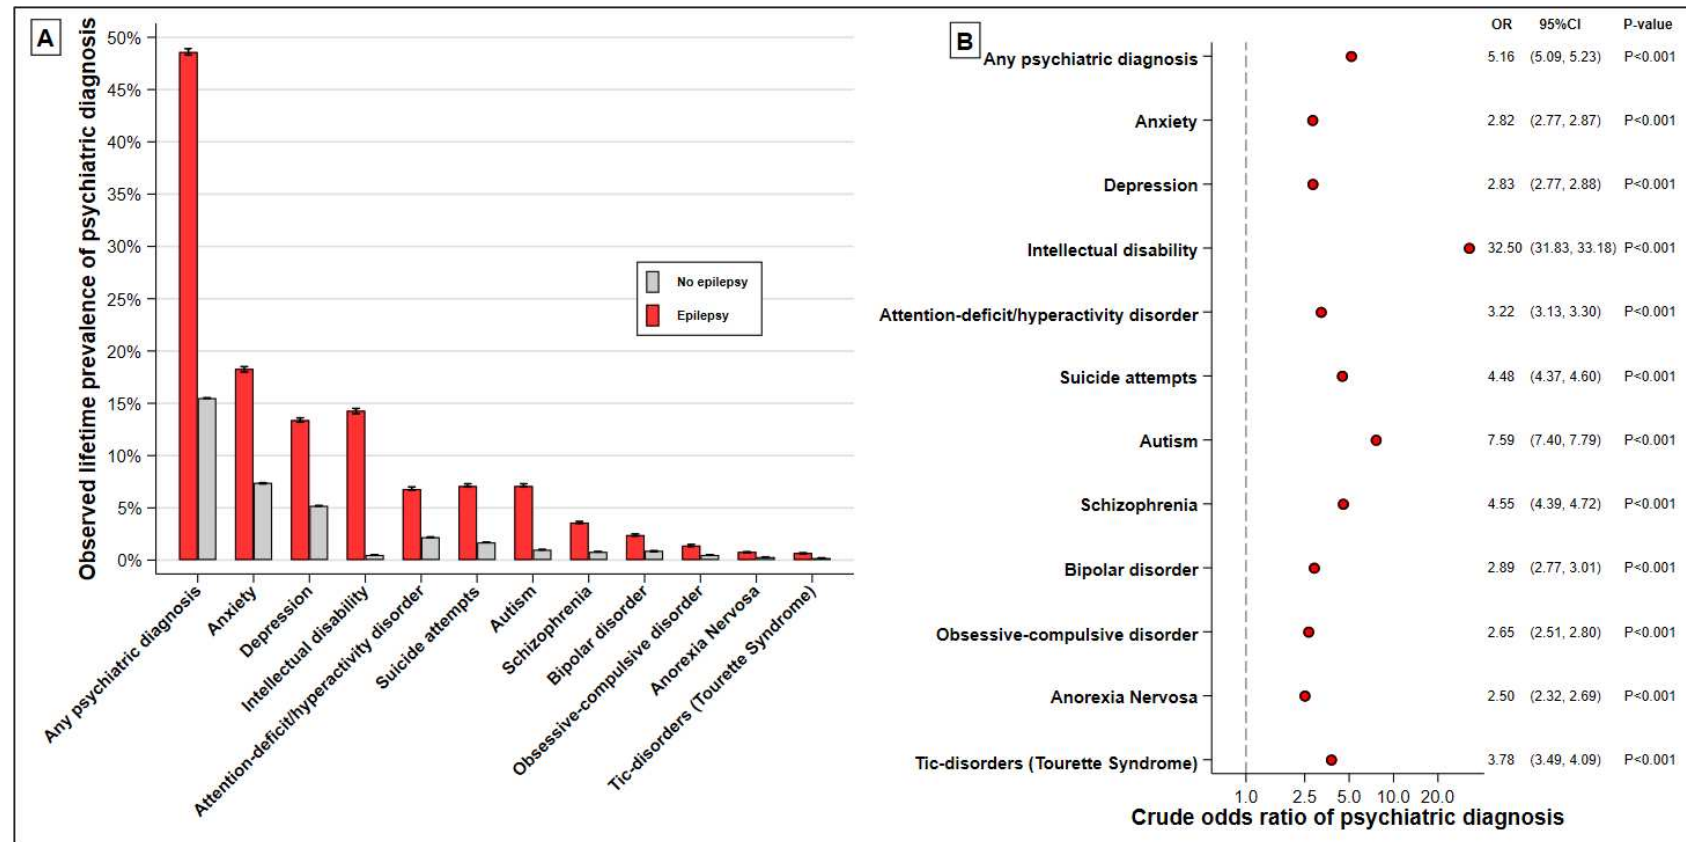

**Supplemental Figure 2. The unadjusted population-wide co-occurrence of epilepsy and psychiatric morbidities.** Panel A illustrates the observed lifetime prevalence of psychiatric diagnoses among those with (N=94 435) and without a diagnosis of epilepsy (N=7 534 060). Panel B illustrates the crude odds ratio of psychiatric diagnoses comparing those with and without a diagnosis of epilepsy. Black lines indicate 95% confidence intervals in both panels (confidence intervals are plotted in panel B but they are smaller than the marker size, reflecting our large sample size).

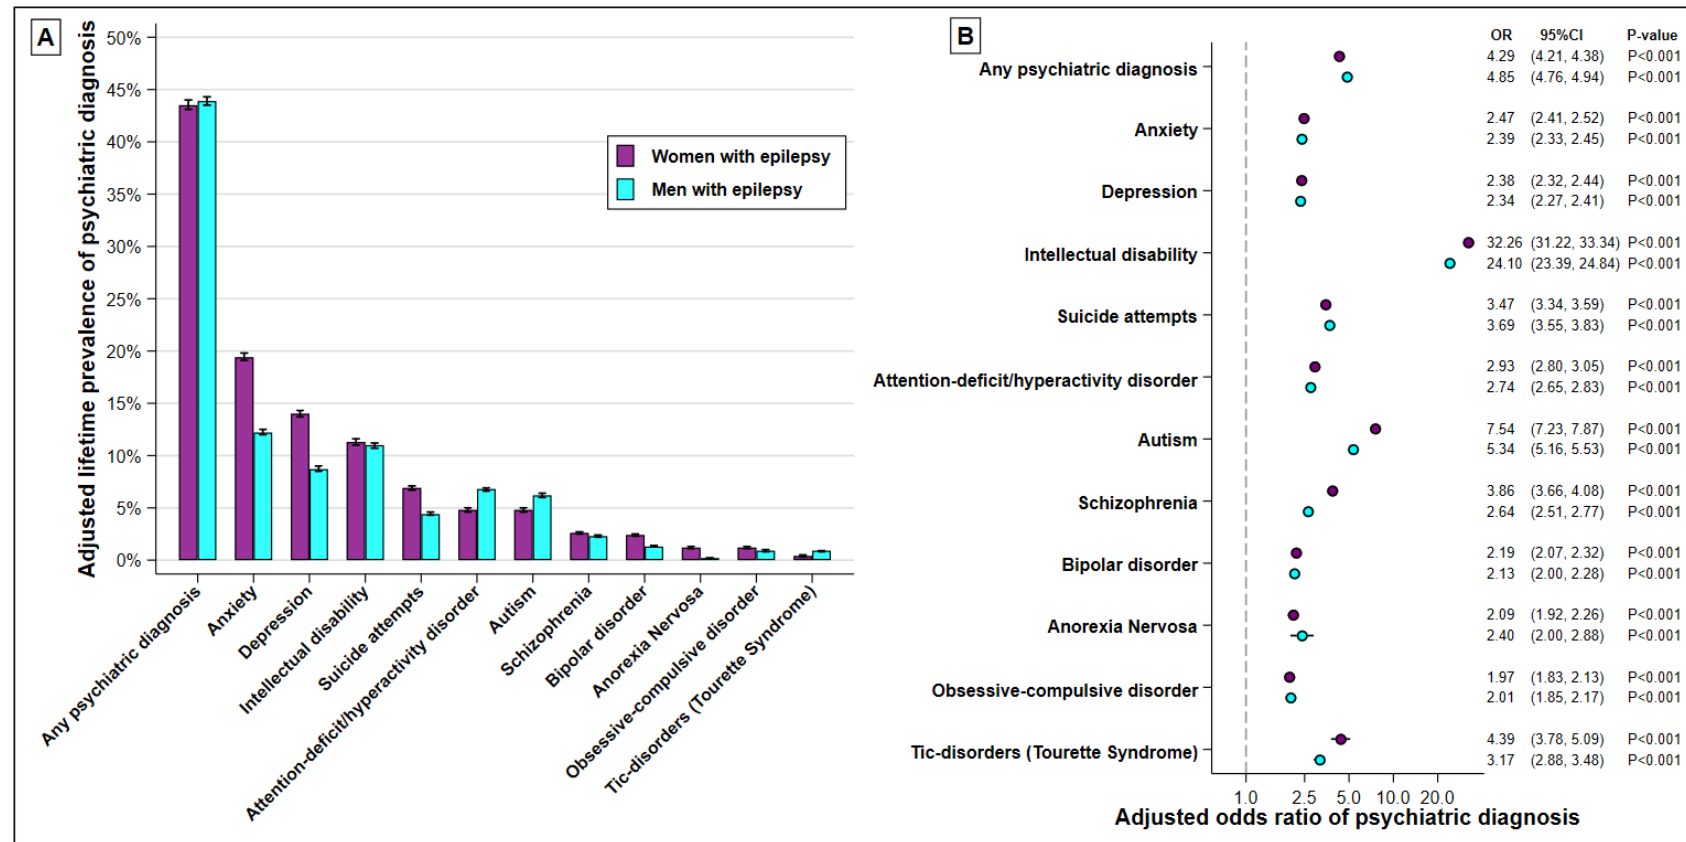

**Supplemental Figure 3. The sex-stratified population-wide co-occurrence of epilepsy and psychiatric morbidities.** Panel A illustrates the adjusted (marginal) lifetime probability of psychiatric diagnoses among those with a diagnosis of epilepsy (N=94 435), stratified by birth sex (purple indicating among women with epilepsy N=44 367, and cyan indicating among men with epilepsy N=50 068). Panel B illustrates the adjusted odds ratio of psychiatric diagnoses comparing those with and without a diagnosis of epilepsy, stratified by birth sex (purple indicating among women and cyan indicating among men). All analyses are adjusted for birth year, highest achieved disposable income, and immigration status. Black lines indicate 95% confidence intervals in both panels (width is sometimes smaller than marker size in panel B).

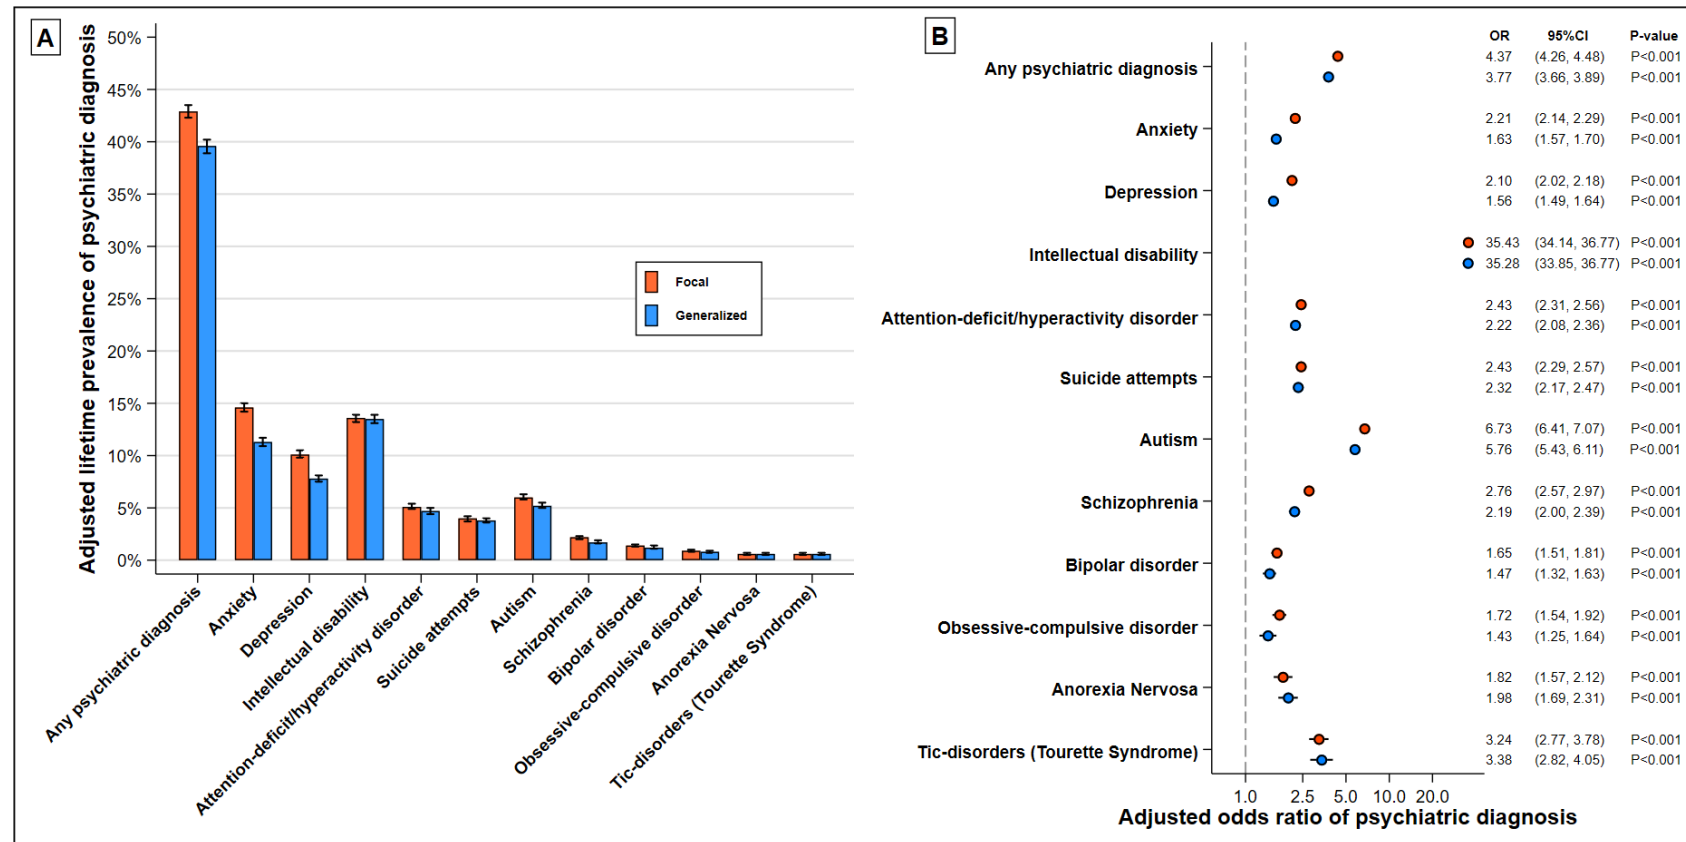

**Supplemental Figure 4. The population-wide co-occurrence of epilepsy and psychiatric morbidities stratified by type of epilepsy.** Panel A illustrates the adjusted (marginal) lifetime probability of psychiatric diagnoses among those with focal (N=24 430) or generalized epilepsy (N=19 199). Panel B illustrates the adjusted odds ratio of psychiatric diagnoses comparing those with focal and generalized epilepsy to those with no epilepsy diagnosis. All analyses are adjusted for birth year, highest achieved disposable income, sex, and immigration status. Black lines indicate 95% confidence intervals in both panels (width is sometimes smaller than marker size in panel B). For graphical purposes, we omit those who were never characterized (N=18 338) or other/unspecific forms of epilepsy (N=32 468) – these individuals did not differ materially in their rate of psychiatric diagnosis as compared to those with focal or generalized epilepsy.



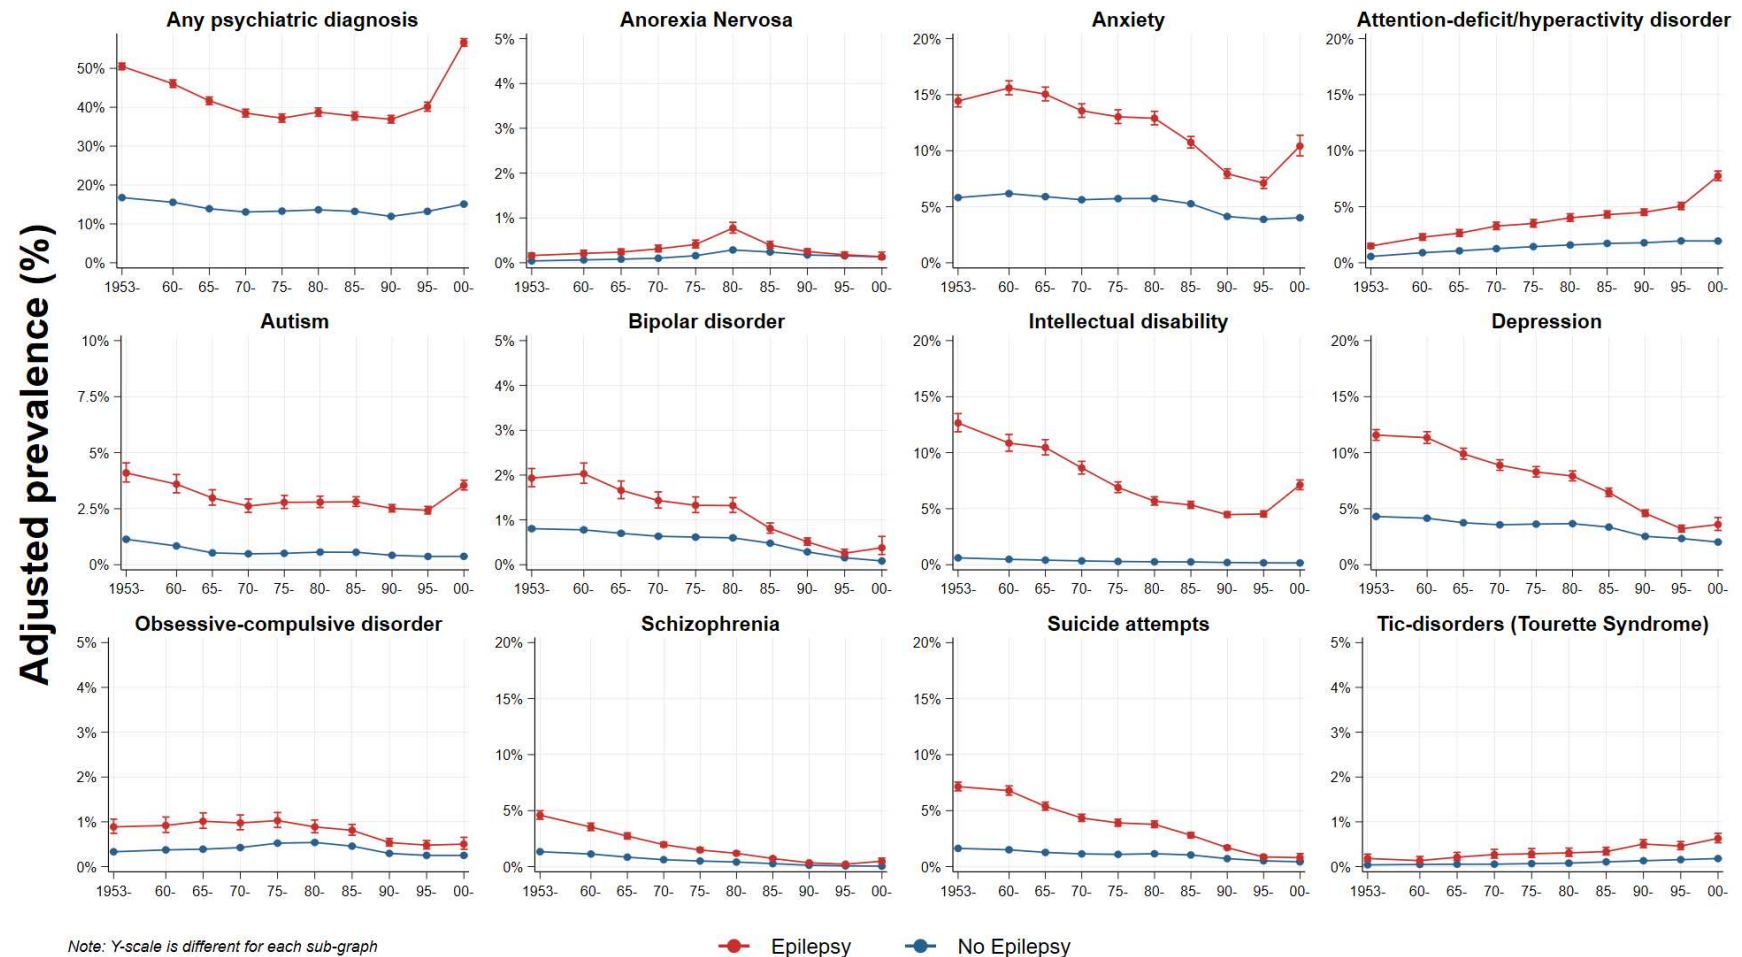

### Birth Cohorts (year)

**Supplemental Figure 5. The population-wide co-occurrence of epilepsy and psychiatric morbidities stratified by birth cohorts.** The vertical lines illustrate the adjusted (marginal) prevalence of psychiatric diagnoses among those with (N=94 435) and without a diagnosis of epilepsy (N=7 534 060). Horizontal lines indicate 95% confidence intervals.



## Extended genomic results

**Supplemental Table 3. Extended results from the LDSC and MR analyses of epilepsy (broadly classified) and selected psychiatric phenotypes.**

| Phenotype                                | Effect of epilepsy on comorbidity |       |      |         | Effect of Comorbidity on Epilepsy |       |      |         | Genetic correlation |         |
|------------------------------------------|-----------------------------------|-------|------|---------|-----------------------------------|-------|------|---------|---------------------|---------|
|                                          | N <sub>iv</sub>                   | β     | OR   | P-value | N <sub>iv</sub>                   | β     | OR   | P-value | rg                  | P-value |
| Focal epilepsy                           | N/A                               | -     | -    | -       | N/A                               | -     | -    | -       | 0.86                | <0.001* |
| Generalized epilepsy                     | N/A                               | -     | -    | -       | N/A                               | -     | -    | -       | 0.92                | <0.001* |
| Anorexia Nervosa                         | 37                                | -0.18 | 0.83 | 0.092   | 39                                | -0.02 | 0.98 | 0.322   | 0.04                | 0.463   |
| Anxiety (Case-control)                   | 39                                | 0.44  | 1.55 | 0.016   | 3                                 | -0.01 | 0.99 | 0.779   | 0.30                | 0.016   |
| Anxiety (Continuous) <sup>1</sup>        | 39                                | 0.05  | -    | 0.086   | 6                                 | 0.01  | 1.01 | 0.897   | 0.06                | 0.638   |
| Attention-deficit/hyperactivity disorder | 37                                | 0.11  | 1.12 | 0.172   | 102                               | 0.03  | 1.03 | 0.018   | 0.18                | <0.001* |
| Autism                                   | 37                                | 0.04  | 1.05 | 0.620   | 21                                | 0.01  | 1.01 | 0.635   | -0.12               | 0.059   |
| Bipolar disorder                         | 37                                | -0.13 | 0.88 | 0.035   | 187                               | 0.00  | 1.00 | 0.734   | -0.11               | 0.005   |
| Intelligence                             | 42                                | -0.03 | 0.97 | 0.384   | 487                               | -0.12 | 0.89 | <0.001* | -0.20               | <0.001* |
| Depression                               | 36                                | 0.00  | -    | 0.957   | 174                               | 0.00  | 1.00 | 0.985   | 0.04                | 0.412   |
| Obsessive-compulsive disorder            | 37                                | -0.16 | 0.86 | 0.448   | 7                                 | -0.02 | 0.98 | 0.273   | -0.10               | 0.244   |
| Schizophrenia                            | 37                                | -0.14 | 0.87 | 0.176   | 489                               | -0.01 | 0.99 | 0.233   | -0.11               | 0.004   |
| Suicide attempts                         | 36                                | -0.01 | 0.99 | 0.870   | 29                                | 0.01  | 1.01 | 0.791   | 0.11                | 0.070   |
| Tic-disorders (Tourette Syndrome)        | 37                                | -0.09 | 0.91 | 0.554   | 9                                 | 0.00  | 1.00 | 0.848   | -0.02               | 0.799   |

<sup>1</sup>In our primary analysis, we leverage the case-control anxiety definitions, to ensure that the findings reflect manifested anxiety. However, we chose to also analyse anxiety as a continuous score obtained from the original GWAS to enhance statistical efficiency.

\*Statistically significant at Bonferroni correction ( $\alpha=0.00075758$  for MR and  $\alpha=0.001515$  for LDSC).

**Supplemental Table 4. Extended results from the LDSC and MR analyses of focal epilepsy and selected psychiatric phenotypes.**

| Phenotype                                | Effect of epilepsy on comorbidity |       |      |         | Effect of Comorbidity on Epilepsy |       |      |         | Genetic correlation |         |
|------------------------------------------|-----------------------------------|-------|------|---------|-----------------------------------|-------|------|---------|---------------------|---------|
|                                          | N <sub>iv</sub>                   | β     | OR   | P-value | N <sub>iv</sub>                   | β     | OR   | P-value | rg                  | P-value |
| Epilepsy (broadly defined)               | N/A                               | -     | -    | -       | N/A                               | -     | -    | -       | 0.86                | <0.001* |
| Generalized epilepsy                     | N/A                               | -     | -    | -       | N/A                               | -     | -    | -       | 0.61                | <0.001* |
| Anorexia Nervosa                         | 25                                | -0.07 | 0.93 | 0.416   | 39                                | 0.00  | 1.00 | 0.983   | 0.00                | 0.953   |
| Anxiety (Case-control)                   | 26                                | 0.08  | 1.08 | 0.658   | 3                                 | 0.01  | 1.01 | 0.824   | 0.39                | 0.036   |
| Anxiety (Continuous) <sup>1</sup>        | 26                                | 0.00  | 1.00 | 0.990   | 6                                 | -0.05 | 0.95 | 0.658   | 0.05                | 0.770   |
| Attention-deficit/hyperactivity disorder | 25                                | 0.02  | 1.02 | 0.766   | 102                               | 0.02  | 1.02 | 0.193   | 0.23                | <0.001* |
| Autism                                   | 25                                | -0.14 | 0.87 | 0.112   | 21                                | 0.01  | 1.01 | 0.747   | -0.17               | 0.059   |
| Bipolar disorder                         | 25                                | -0.08 | 0.92 | 0.423   | 187                               | 0.00  | 1.00 | 0.713   | -0.11               | 0.058   |
| Intelligence                             | 28                                | -0.01 | 0.99 | 0.533   | 487                               | -0.13 | 0.88 | <0.001* | -0.24               | <0.001* |
| Depression                               | 25                                | 0.05  | 1.05 | 0.169   | 174                               | 0.02  | 1.02 | 0.447   | 0.10                | 0.102   |
| Obsessive-compulsive disorder            | 25                                | 0.21  | 1.23 | 0.339   | 7                                 | -0.03 | 0.97 | 0.078   | -0.06               | 0.609   |
| Schizophrenia                            | 25                                | -0.15 | 0.86 | 0.059   | 489                               | -0.01 | 0.99 | 0.274   | -0.14               | 0.005   |
| Suicide attempts                         | 24                                | -0.03 | 0.97 | 0.730   | 29                                | 0.00  | 1.00 | 0.952   | 0.12                | 0.209   |
| Tic-disorders (Tourette Syndrome)        | 25                                | 0.24  | 1.27 | 0.128   | 9                                 | 0.00  | 1.00 | 0.814   | -0.0103             | 0.925   |

<sup>1</sup>In our primary analysis, we leverage the case-control anxiety definitions, to ensure that the findings reflect manifested anxiety. However, we chose to also analyse anxiety as a continuous score obtained from the original GWAS to enhance statistical efficiency.

\*Statistically significant at Bonferroni correction ( $\alpha=0.00075758$  for MR and  $\alpha=0.001515$  for LDSC).

**Supplemental Table 5. Extended results from the LDSC and MR analyses of generalized epilepsy and selected psychiatric phenotypes.**

| Phenotype                                | Effect of epilepsy on comorbidity |       |      |         | Effect of Comorbidity on Epilepsy |       |      |         | Genetic correlation |         |
|------------------------------------------|-----------------------------------|-------|------|---------|-----------------------------------|-------|------|---------|---------------------|---------|
|                                          | N <sub>iv</sub>                   | β     | OR   | P-value | N <sub>iv</sub>                   | β     | OR   | P-value | rg                  | P-value |
| Generalized epilepsy                     |                                   |       |      |         |                                   |       |      |         |                     |         |
| Epilepsy (broadly defined)               | N/A                               | -     | -    | -       | N/A                               | -     | -    | -       | 0.92                | <0.001* |
| Focal epilepsy                           | N/A                               | -     | -    | -       | N/A                               | -     | -    | -       | 0.61                | <0.001* |
| Anorexia Nervosa                         | 67                                | -0.01 | 0.99 | 0.839   | 39                                | -0.04 | 0.96 | 0.251   | 0.01                | 0.803   |
| Anxiety (Case-control)                   | 78                                | 0.05  | 1.05 | 0.476   | 3                                 | -0.06 | 0.94 | 0.320   | 0.16                | 0.137   |
| Anxiety (Continuous) <sup>1</sup>        | 78                                | -0.02 | 0.98 | 0.151   | 6                                 | 0.02  | 1.02 | 0.916   | 0.05                | 0.692   |
| Attention-deficit/hyperactivity disorder | 67                                | 0.06  | 1.06 | 0.071   | 102                               | 0.06  | 1.06 | 0.015   | 0.10                | 0.009   |
| Autism                                   | 67                                | 0.00  | 1.00 | 0.926   | 21                                | -0.02 | 0.98 | 0.563   | -0.09               | 0.088   |
| Bipolar disorder                         | 67                                | -0.02 | 0.98 | 0.647   | 187                               | -0.03 | 0.98 | 0.235   | -0.10               | 0.003   |
| Intelligence                             | 80                                | 0.00  | 1.00 | 0.906   | 487                               | -0.14 | 0.87 | <0.001* | -0.14               | <0.001* |
| Depression                               | 66                                | 0.00  | 1.00 | 0.745   | 174                               | -0.03 | 0.97 | 0.502   | -0.01               | 0.728   |
| Obsessive-compulsive disorder            | 67                                | -0.04 | 0.96 | 0.658   | 7                                 | -0.02 | 0.98 | 0.442   | -0.13               | 0.061   |
| Schizophrenia                            | 67                                | 0.03  | 1.03 | 0.483   | 489                               | -0.02 | 0.98 | 0.264   | -0.07               | 0.050   |
| Suicide attempts                         | 65                                | -0.03 | 0.97 | 0.365   | 29                                | -0.01 | 0.99 | 0.779   | 0.06                | 0.256   |
| Tic-disorders (Tourette Syndrome)        | 67                                | 0.02  | 1.02 | 0.747   | 9                                 | -0.01 | 0.99 | 0.835   | 0.02                | 0.699   |

<sup>1</sup>In our primary analysis, we leverage the case-control anxiety definitions, to ensure that the findings reflect manifested anxiety. However, we chose to also analyse anxiety as a continuous score obtained from the original GWAS to enhance statistical efficiency.

\*Statistically significant at Bonferroni correction ( $\alpha=0.00075758$  for MR and  $\alpha=0.001515$  for LDSC).

## eMethods - Mendelian sensitivity analysis

To allow for the potential of horizontal pleiotropy, whereby the instruments are related to the outcome through some pathway that is independent of the exposure, we employed MR-Egger regression.[1] In MR-Egger regression the intercept is unconstrained, in contrast to the IVW regression, and a non-zero intercept can be interpreted as the presence of horizontal pleiotropy and the slope the causal effect in presence of horizontal pleiotropy,[1] under the instrument independent of direct effects (InSIDE) assumption.

In addition to MR-Egger, we conducted a series of commonly employed MR analyses with relaxed instrumental variable assumptions. First, we conducted weighted median MR, which provides an unbiased estimate when at least 50% of the genetic variants are valid instruments. Second, we conducted a mode-based MR which assumes that more instruments estimate the true causal effect of the exposure than any other effect. The benefit of the median and mode-based regressions compared to MR Egger is that they are more efficient – at the cost of being less robust to horizontal pleiotropy.

Since we employed an inclusive approach to instrument selection ( $p$ -value $<5\times 10^{-06}$ ), and this may lead to bias towards the null under weak instrument bias and absence of sample overlap between GWAS studies, we repeated our primary analyses (IVW regression) using a more conservative  $p$ -value threshold ( $p$ -value $<5\times 10^{-08}$ ) for instrument selection.

### Findings of mendelian sensitivity analysis

There was no evidence of horizontal pleiotropy (Supplemental Figure 6 & Supplemental Table 6). The MR Egger intercept that had the lowest  $p$ -value was the association between genetic liability to bipolar disorder and epilepsy (Egger intercept  $-0.005$ ,  $p=0.073$ ). The greatest egger intercept was identified for the association between anxiety disorder and generalized epilepsy (Egger intercept  $0.089$ ), although its standard error was large ( $p=0.738$ ).

There was no consistent difference, at large, between our primary causal analyses and several sensitivity analyses (Supplement Supplemental Table 7). Specifically, using the weighted median, egger, simple mode, and weighted mode regression was consistent with the IVW regression (primary analyses). As in our primary analyses, there was a persistent negative effect of genetic liability to intelligence on epilepsy when employing median and mode-based analyses (Supplement Supplemental Table 7).

There was no difference between our primary analysis and when considering a more conservative  $p$ -value threshold ( $p$ -value $<5\times 10^{-08}$ ) for instrument selection, although the precision was reduced.

However, one deviation from our primary analysis is noteworthy. In our initial assessment, we identified a positive association between genetic predisposition to (broadly classified) epilepsy and anxiety. However, this association could not be reproduced when employing the continuous anxiety score or utilizing MR-Egger.

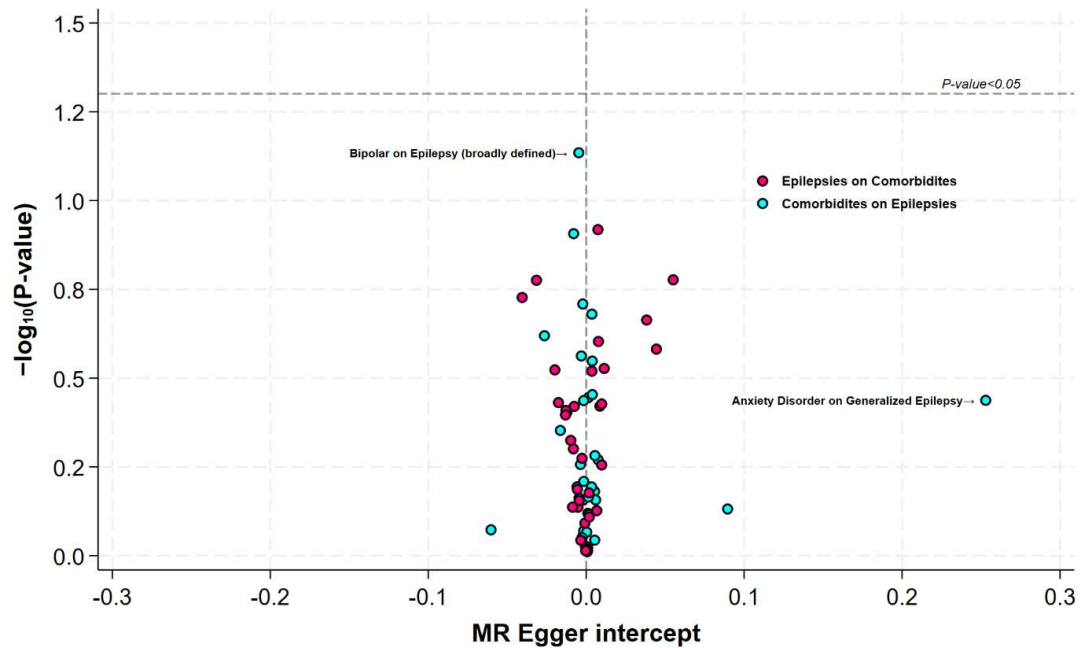

**Supplemental Figure 6. Volcano plot of the MR-Egger intercept and corresponding intercept p-value for each Mendelian randomization analysis.** Departure from zero of the egger-intercept is indicative of horizontal pleiotropy, which biases standard Mendelian randomization analysis. The grey dotted line horizontally marks the zero intercept and vertically marks the level above which a p-value is less than 0.05 on the standard scale. The mendelian analysis of genetic liability to bipolar on epilepsy is highlighted as the egger intercept with the lowest p-value (0.073269). The mendelian analysis of genetic liability to anxiety disorder on generalized epilepsy is highlighted as it was of the greatest magnitude (although its p-value is large).

**Supplemental Table 6. Egger intercepts for all Mendelian analyses.**

| Epilepsy (broadly defined)               | Epilepsy on Comorbidity |         | Comorbidity on epilepsy |         |
|------------------------------------------|-------------------------|---------|-------------------------|---------|
|                                          | Egger Intercept         | P-value | Egger Intercept         | P-value |
| Attention-deficit/hyperactivity disorder | 0.011                   | 0.297   | 0.004                   | 0.283   |
| Anorexia Nervosa                         | -0.005                  | 0.729   | -0.001                  | 0.938   |
| Anxiety (Case-control)                   | 0.038                   | 0.217   | 0.089                   | 0.738   |
| Anxiety (Continuous)                     | 0.007                   | 0.121   | -0.002                  | 0.875   |
| Autism                                   | -0.006                  | 0.650   | 0.005                   | 0.658   |
| Bipolar disorder                         | -0.006                  | 0.493   | -0.005                  | 0.073   |
| Intelligence                             | -0.003                  | 0.532   | -0.002                  | 0.195   |
| Major depression                         | 0.000                   | 0.953   | 0.001                   | 0.759   |
| Obsessive-compulsive disorder            | -0.041                  | 0.187   | -0.006                  | 0.640   |
| Schizophrenia                            | -0.012                  | 0.394   | 0.001                   | 0.358   |
| Suicide attempts                         | -0.008                  | 0.500   | -0.002                  | 0.696   |
| Tic-disorders (Tourette Syndrome)        | 0.007                   | 0.746   | 0.001                   | 0.974   |
| <b>Focal epilepsy</b>                    |                         |         |                         |         |
| Attention-deficit/hyperactivity disorder | -0.013                  | 0.390   | 0.004                   | 0.351   |
| Anorexia Nervosa                         | 0.010                   | 0.555   | -0.002                  | 0.850   |
| Anxiety (Case-control)                   | 0.044                   | 0.262   | -0.060                  | 0.845   |
| Anxiety (Continuous)                     | 0.008                   | 0.249   | 0.006                   | 0.696   |
| Autism                                   | 0.001                   | 0.964   | 0.008                   | 0.537   |
| Bipolar disorder                         | -0.018                  | 0.370   | -0.003                  | 0.274   |
| Intelligence                             | -0.001                  | 0.809   | -0.002                  | 0.365   |
| Major depression                         | 0.002                   | 0.778   | 0.001                   | 0.683   |
| Obsessive-compulsive disorder            | 0.055                   | 0.167   | -0.005                  | 0.687   |
| Schizophrenia                            | -0.013                  | 0.401   | 0.000                   | 0.858   |
| Suicide attempts                         | -0.009                  | 0.729   | -0.004                  | 0.553   |
| Tic-disorders (Tourette Syndrome)        | -0.003                  | 0.904   | -0.003                  | 0.889   |
| <b>Generalized epilepsy</b>              |                         |         |                         |         |
| Attention-deficit/hyperactivity disorder | -0.008                  | 0.380   | 0.003                   | 0.640   |
| Anorexia Nervosa                         | -0.010                  | 0.473   | 0.001                   | 0.949   |
| Anxiety (Case-control)                   | 0.024                   | 0.218   | 0.253                   | 0.365   |
| Anxiety (Continuous)                     | 0.004                   | 0.302   | -0.027                  | 0.240   |
| Autism                                   | -0.004                  | 0.698   | 0.001                   | 0.970   |
| Bipolar disorder                         | 0.009                   | 0.379   | -0.008                  | 0.124   |
| Intelligence                             | 0.002                   | 0.665   | -0.002                  | 0.617   |
| Major depression                         | 0.000                   | 0.960   | 0.002                   | 0.765   |
| Obsessive-compulsive disorder            | -0.032                  | 0.168   | -0.016                  | 0.444   |
| Schizophrenia                            | 0.010                   | 0.374   | 0.004                   | 0.209   |
| Suicide attempts                         | 0.000                   | 0.968   | 0.005                   | 0.522   |
| Tic-disorders (Tourette Syndrome)        | -0.020                  | 0.300   | 0.005                   | 0.903   |

**Supplemental Table 7. Mendelian sensitivity analyses (see eMethods for description of each analysis).**

|                                                 | Epilepsy on Comorbidity |       |      |         | Comorbidity on Epilepsy |       |      |         |
|-------------------------------------------------|-------------------------|-------|------|---------|-------------------------|-------|------|---------|
|                                                 | N <sub>IV</sub>         | β     | OR   | P-value | N <sub>IV</sub>         | β     | OR   | P-value |
| <b>Epilepsy (broadly defined)</b>               |                         |       |      |         |                         |       |      |         |
| <i>Anorexia Nervosa</i>                         |                         |       |      |         |                         |       |      |         |
| MR Egger                                        | 37                      | -0.02 | 0.98 | 0.958   | 39                      | -0.01 | 0.99 | 0.919   |
| Simple mode                                     | 37                      | -0.31 | 0.73 | 0.194   | 39                      | -0.07 | 0.94 | 0.143   |
| Weighted median                                 | 37                      | -0.20 | 0.82 | 0.106   | 39                      | -0.02 | 0.98 | 0.206   |
| Weighted mode                                   | 37                      | -0.18 | 0.83 | 0.386   | 39                      | -0.07 | 0.94 | 0.131   |
| <i>Anxiety (Case-control)</i>                   |                         |       |      |         |                         |       |      |         |
| MR Egger                                        | 39                      | -0.72 | 0.49 | 0.449   | 3                       | -0.60 | 0.55 | 0.733   |
| Simple mode                                     | 39                      | 0.98  | 2.65 | 0.044   | 3                       | -0.05 | 0.95 | 0.419   |
| Weighted median                                 | 39                      | 0.67  | 1.95 | 0.005   | 3                       | -0.02 | 0.98 | 0.498   |
| Weighted mode                                   | 39                      | 0.91  | 2.48 | 0.050   | 3                       | -0.04 | 0.96 | 0.435   |
| <i>Anxiety (Continuous)</i>                     |                         |       |      |         |                         |       |      |         |
| MR Egger                                        | 39                      | -0.18 | -    | 0.225   | 6                       | 0.08  | 1.08 | 0.857   |
| Simple mode                                     | 39                      | 0.13  | -    | 0.141   | 6                       | 0.09  | 1.09 | 0.631   |
| Weighted median                                 | 39                      | 0.06  | -    | 0.107   | 6                       | 0.04  | 1.04 | 0.727   |
| Weighted mode                                   | 39                      | 0.13  | -    | 0.132   | 6                       | 0.07  | 1.07 | 0.690   |
| <i>Attention-deficit/hyperactivity disorder</i> |                         |       |      |         |                         |       |      |         |
| MR Egger                                        | 37                      | -0.22 | 0.80 | 0.495   | 102                     | -0.04 | 0.96 | 0.554   |
| Simple mode                                     | 37                      | 0.03  | 1.03 | 0.872   | 102                     | -0.02 | 0.98 | 0.743   |
| Weighted median                                 | 37                      | 0.04  | 1.04 | 0.628   | 102                     | 0.03  | 1.03 | 0.060   |
| Weighted mode                                   | 37                      | 0.00  | 1.00 | 0.989   | 102                     | 0.00  | 1.00 | 0.937   |
| <i>Autism</i>                                   |                         |       |      |         |                         |       |      |         |
| MR Egger                                        | 37                      | 0.21  | 1.23 | 0.576   | 21                      | -0.06 | 0.95 | 0.719   |
| Simple mode                                     | 37                      | 0.16  | 1.17 | 0.539   | 21                      | 0.05  | 1.05 | 0.362   |
| Weighted median                                 | 37                      | 0.11  | 1.12 | 0.337   | 21                      | 0.03  | 1.03 | 0.231   |
| Weighted mode                                   | 37                      | 0.15  | 1.16 | 0.526   | 21                      | 0.04  | 1.04 | 0.391   |
| <i>Bipolar disorder</i>                         |                         |       |      |         |                         |       |      |         |
| MR Egger                                        | 37                      | 0.05  | 1.05 | 0.865   | 187                     | 0.08  | 1.08 | 0.095   |
| Simple mode                                     | 37                      | -0.21 | 0.81 | 0.290   | 187                     | -0.02 | 0.98 | 0.668   |
| Weighted median                                 | 37                      | -0.19 | 0.83 | 0.027   | 187                     | -0.01 | 0.99 | 0.499   |
| Weighted mode                                   | 37                      | -0.28 | 0.76 | 0.130   | 187                     | -0.01 | 0.99 | 0.789   |
| <i>Intelligence</i>                             |                         |       |      |         |                         |       |      |         |
| MR Egger                                        | 42                      | 0.05  | -    | 0.698   | 487                     | 0.01  | 1.01 | 0.948   |
| Simple mode                                     | 42                      | -0.02 | -    | 0.807   | 487                     | -0.19 | 0.83 | 0.070   |
| Weighted median                                 | 42                      | -0.01 | -    | 0.649   | 487                     | -0.10 | 0.91 | 0.000   |
| Weighted mode                                   | 42                      | 0.00  | -    | 0.972   | 487                     | -0.11 | 0.89 | 0.260   |
| <i>Depression</i>                               |                         |       |      |         |                         |       |      |         |
| MR Egger                                        | 36                      | -0.02 | 0.98 | 0.945   | 174                     | -0.04 | 0.96 | 0.765   |
| Simple mode                                     | 36                      | 0.06  | 1.06 | 0.491   | 174                     | -0.01 | 0.99 | 0.951   |
| Weighted median                                 | 36                      | -0.01 | 0.99 | 0.874   | 174                     | -0.01 | 0.99 | 0.795   |
| Weighted mode                                   | 36                      | 0.06  | 1.06 | 0.421   | 174                     | -0.02 | 0.98 | 0.869   |
| <i>Obsessive-compulsive disorder</i>            |                         |       |      |         |                         |       |      |         |
| MR Egger                                        | 37                      | 1.06  | 2.88 | 0.260   | 7                       | 0.01  | 1.01 | 0.894   |
| Simple mode                                     | 37                      | 0.56  | 1.75 | 0.400   | 7                       | -0.03 | 0.97 | 0.347   |
| Weighted median                                 | 37                      | 0.29  | 1.34 | 0.305   | 7                       | -0.03 | 0.98 | 0.177   |
| Weighted mode                                   | 37                      | 0.55  | 1.73 | 0.403   | 7                       | -0.03 | 0.97 | 0.324   |
| <i>Schizophrenia</i>                            |                         |       |      |         |                         |       |      |         |
| MR Egger                                        | 37                      | 0.23  | 1.26 | 0.601   | 489                     | -0.04 | 0.97 | 0.237   |
| Simple mode                                     | 37                      | -0.23 | 0.80 | 0.312   | 489                     | 0.00  | 1.00 | 0.939   |
| Weighted median                                 | 37                      | -0.07 | 0.93 | 0.404   | 489                     | 0.00  | 1.00 | 0.735   |
| Weighted mode                                   | 37                      | 0.15  | 1.17 | 0.476   | 489                     | 0.00  | 1.00 | 0.925   |
| <i>Suicide attempts</i>                         |                         |       |      |         |                         |       |      |         |
| MR Egger                                        | 36                      | 0.23  | 1.26 | 0.529   | 29                      | 0.04  | 1.04 | 0.658   |
| Simple mode                                     | 36                      | -0.05 | 0.95 | 0.799   | 29                      | 0.02  | 1.02 | 0.783   |
| Weighted median                                 | 36                      | 0.01  | 1.01 | 0.948   | 29                      | 0.01  | 1.01 | 0.844   |
| Weighted mode                                   | 36                      | -0.05 | 0.95 | 0.797   | 29                      | 0.02  | 1.02 | 0.783   |
| <i>Tic-disorders (Tourette Syndrome)</i>        |                         |       |      |         |                         |       |      |         |
| MR Egger                                        | 37                      | -0.28 | 0.75 | 0.647   | 9                       | 0.00  | 1.00 | 0.993   |
| Simple mode                                     | 37                      | -0.24 | 0.78 | 0.600   | 9                       | 0.02  | 1.02 | 0.682   |
| Weighted median                                 | 37                      | -0.19 | 0.83 | 0.366   | 9                       | 0.01  | 1.01 | 0.589   |
| Weighted mode                                   | 37                      | -0.22 | 0.81 | 0.593   | 9                       | 0.02  | 1.02 | 0.571   |
| <b>Focal epilepsy</b>                           |                         |       |      |         |                         |       |      |         |
| <i>Anorexia Nervosa</i>                         |                         |       |      |         |                         |       |      |         |
| MR Egger                                        | 25                      | -0.32 | 0.73 | 0.462   | 39                      | 0.02  | 1.02 | 0.855   |
| Simple mode                                     | 25                      | -0.19 | 0.83 | 0.373   | 39                      | -0.03 | 0.97 | 0.597   |
| Weighted median                                 | 25                      | -0.08 | 0.92 | 0.490   | 39                      | -0.02 | 0.98 | 0.381   |
| Weighted mode                                   | 25                      | -0.17 | 0.85 | 0.466   | 39                      | -0.02 | 0.98 | 0.709   |
| <i>Anxiety (Case-control)</i>                   |                         |       |      |         |                         |       |      |         |
| MR Egger                                        | 26                      | -1.07 | 0.34 | 0.301   | 3                       | 0.41  | 1.51 | 0.841   |
| Simple mode                                     | 26                      | -0.59 | 0.55 | 0.284   | 3                       | -0.03 | 0.97 | 0.622   |
| Weighted median                                 | 26                      | -0.16 | 0.86 | 0.523   | 3                       | -0.01 | 0.99 | 0.816   |
| Weighted mode                                   | 26                      | -0.57 | 0.57 | 0.334   | 3                       | -0.03 | 0.97 | 0.628   |



|                                                 |    |       |      |       |     |       |      |       |
|-------------------------------------------------|----|-------|------|-------|-----|-------|------|-------|
| <i>Anxiety (Continuous)</i>                     |    |       |      |       |     |       |      |       |
| MR Egger                                        | 26 | -0.20 | -    | 0.256 | 6   | -0.25 | 0.78 | 0.638 |
| Simple mode                                     | 26 | -0.02 | -    | 0.802 | 6   | 0.16  | 1.17 | 0.530 |
| Weighted median                                 | 26 | 0.00  | -    | 0.960 | 6   | -0.04 | 0.96 | 0.762 |
| Weighted mode                                   | 26 | -0.03 | -    | 0.679 | 6   | -0.16 | 0.85 | 0.445 |
| <i>Attention-deficit/hyperactivity disorder</i> |    |       |      |       |     |       |      |       |
| MR Egger                                        | 25 | 0.36  | 1.43 | 0.369 | 102 | -0.05 | 0.95 | 0.509 |
| Simple mode                                     | 25 | 0.19  | 1.21 | 0.327 | 102 | 0.07  | 1.08 | 0.172 |
| Weighted median                                 | 25 | 0.01  | 1.01 | 0.885 | 102 | 0.03  | 1.03 | 0.094 |
| Weighted mode                                   | 25 | 0.16  | 1.18 | 0.380 | 102 | 0.06  | 1.07 | 0.181 |
| <i>Autism</i>                                   |    |       |      |       |     |       |      |       |
| MR Egger                                        | 25 | -0.16 | 0.85 | 0.738 | 21  | -0.09 | 0.91 | 0.577 |
| Simple mode                                     | 25 | -0.24 | 0.79 | 0.346 | 21  | 0.04  | 1.04 | 0.546 |
| Weighted median                                 | 25 | -0.19 | 0.82 | 0.123 | 21  | 0.01  | 1.01 | 0.845 |
| Weighted mode                                   | 25 | -0.19 | 0.83 | 0.470 | 21  | -0.04 | 0.96 | 0.488 |
| <i>Bipolar disorder</i>                         |    |       |      |       |     |       |      |       |
| MR Egger                                        | 25 | 0.38  | 1.46 | 0.468 | 187 | 0.06  | 1.06 | 0.250 |
| Simple mode                                     | 25 | -0.20 | 0.82 | 0.225 | 187 | -0.01 | 0.99 | 0.772 |
| Weighted median                                 | 25 | -0.14 | 0.87 | 0.098 | 187 | -0.01 | 0.99 | 0.685 |
| Weighted mode                                   | 25 | -0.19 | 0.83 | 0.234 | 187 | -0.01 | 0.99 | 0.745 |
| <i>Intelligence</i>                             |    |       |      |       |     |       |      |       |
| MR Egger                                        | 28 | 0.01  | -    | 0.930 | 487 | -0.04 | 0.97 | 0.743 |
| Simple mode                                     | 28 | -0.01 | -    | 0.829 | 487 | -0.14 | 0.87 | 0.232 |
| Weighted median                                 | 28 | -0.01 | -    | 0.683 | 487 | -0.12 | 0.88 | 0.000 |
| Weighted mode                                   | 28 | -0.01 | -    | 0.820 | 487 | -0.14 | 0.87 | 0.182 |
| <i>Depression</i>                               |    |       |      |       |     |       |      |       |
| MR Egger                                        | 25 | 0.00  | 1.00 | 0.991 | 174 | -0.04 | 0.96 | 0.790 |
| Simple mode                                     | 25 | 0.07  | 1.08 | 0.349 | 174 | -0.05 | 0.96 | 0.688 |
| Weighted median                                 | 25 | 0.06  | 1.07 | 0.095 | 174 | -0.02 | 0.98 | 0.612 |
| Weighted mode                                   | 25 | 0.07  | 1.08 | 0.288 | 174 | -0.05 | 0.96 | 0.648 |
| <i>Obsessive-compulsive disorder</i>            |    |       |      |       |     |       |      |       |
| MR Egger                                        | 25 | -1.21 | 0.30 | 0.245 | 7   | -0.01 | 0.99 | 0.910 |
| Simple mode                                     | 25 | 0.40  | 1.49 | 0.569 | 7   | -0.05 | 0.95 | 0.186 |
| Weighted median                                 | 25 | 0.16  | 1.18 | 0.581 | 7   | -0.03 | 0.97 | 0.192 |
| Weighted mode                                   | 25 | 0.37  | 1.45 | 0.559 | 7   | -0.01 | 0.99 | 0.689 |
| <i>Schizophrenia</i>                            |    |       |      |       |     |       |      |       |
| MR Egger                                        | 25 | 0.19  | 1.21 | 0.636 | 489 | -0.01 | 0.99 | 0.659 |
| Simple mode                                     | 25 | -0.15 | 0.86 | 0.280 | 489 | -0.01 | 0.99 | 0.825 |
| Weighted median                                 | 25 | -0.06 | 0.94 | 0.435 | 489 | 0.00  | 1.00 | 0.874 |
| Weighted mode                                   | 25 | -0.05 | 0.95 | 0.685 | 489 | 0.00  | 1.00 | 0.934 |
| <i>Suicide attempts</i>                         |    |       |      |       |     |       |      |       |
| MR Egger                                        | 24 | 0.20  | 1.22 | 0.771 | 29  | 0.06  | 1.06 | 0.576 |
| Simple mode                                     | 24 | 0.15  | 1.16 | 0.447 | 29  | 0.06  | 1.07 | 0.423 |
| Weighted median                                 | 24 | 0.04  | 1.04 | 0.686 | 29  | 0.04  | 1.04 | 0.286 |
| Weighted mode                                   | 24 | 0.12  | 1.13 | 0.513 | 29  | 0.06  | 1.06 | 0.445 |
| <i>Tic-disorders (Tourette Syndrome)</i>        |    |       |      |       |     |       |      |       |
| MR Egger                                        | 25 | 0.33  | 1.39 | 0.662 | 9   | 0.02  | 1.02 | 0.865 |
| Simple mode                                     | 25 | 0.22  | 1.24 | 0.633 | 9   | 0.00  | 1.00 | 0.970 |
| Weighted median                                 | 25 | 0.21  | 1.23 | 0.307 | 9   | 0.00  | 1.00 | 0.988 |
| Weighted mode                                   | 25 | 0.19  | 1.21 | 0.677 | 9   | 0.00  | 1.00 | 0.969 |
| <i>Generalized epilepsy</i>                     |    |       |      |       |     |       |      |       |
| <i>Anorexia Nervosa</i>                         |    |       |      |       |     |       |      |       |
| MR Egger                                        | 67 | 0.16  | 1.17 | 0.511 | 39  | -0.05 | 0.95 | 0.787 |
| Simple mode                                     | 67 | 0.03  | 1.03 | 0.813 | 39  | -0.03 | 0.97 | 0.721 |
| Weighted median                                 | 67 | 0.05  | 1.05 | 0.356 | 39  | -0.02 | 0.98 | 0.605 |
| Weighted mode                                   | 67 | 0.05  | 1.05 | 0.733 | 39  | -0.03 | 0.97 | 0.723 |
| <i>Anxiety (Case-control)</i>                   |    |       |      |       |     |       |      |       |
| MR Egger                                        | 78 | -0.38 | 0.68 | 0.279 | 3   | -1.73 | 0.18 | 0.355 |
| Simple mode                                     | 78 | 0.03  | 1.04 | 0.888 | 3   | 0.00  | 1.00 | 0.995 |
| Weighted median                                 | 78 | 0.06  | 1.06 | 0.540 | 3   | -0.01 | 0.99 | 0.875 |
| Weighted mode                                   | 78 | 0.10  | 1.10 | 0.640 | 3   | 0.00  | 1.00 | 0.997 |
| <i>Anxiety (Continuous)</i>                     |    |       |      |       |     |       |      |       |
| MR Egger                                        | 78 | -0.08 | -    | 0.201 | 6   | 0.93  | 2.52 | 0.243 |
| Simple mode                                     | 78 | -0.01 | -    | 0.696 | 6   | 0.17  | 1.18 | 0.517 |
| Weighted median                                 | 78 | -0.02 | -    | 0.366 | 6   | 0.16  | 1.18 | 0.402 |
| Weighted mode                                   | 78 | -0.01 | -    | 0.663 | 6   | 0.18  | 1.20 | 0.473 |
| <i>Attention-deficit/hyperactivity disorder</i> |    |       |      |       |     |       |      |       |
| MR Egger                                        | 67 | 0.19  | 1.21 | 0.213 | 102 | 0.00  | 1.00 | 0.987 |
| Simple mode                                     | 67 | -0.08 | 0.92 | 0.495 | 102 | 0.05  | 1.05 | 0.505 |
| Weighted median                                 | 67 | 0.03  | 1.04 | 0.392 | 102 | 0.05  | 1.05 | 0.066 |
| Weighted mode                                   | 67 | -0.09 | 0.91 | 0.453 | 102 | 0.04  | 1.04 | 0.569 |
| <i>Autism</i>                                   |    |       |      |       |     |       |      |       |
| MR Egger                                        | 67 | 0.08  | 1.08 | 0.690 | 21  | -0.03 | 0.97 | 0.896 |
| Simple mode                                     | 67 | -0.03 | 0.98 | 0.858 | 21  | 0.05  | 1.05 | 0.596 |
| Weighted median                                 | 67 | -0.01 | 0.99 | 0.905 | 21  | 0.04  | 1.04 | 0.402 |
| Weighted mode                                   | 67 | -0.02 | 0.98 | 0.905 | 21  | 0.04  | 1.04 | 0.578 |

|                                          |    |       |      |       |     |       |      |       |
|------------------------------------------|----|-------|------|-------|-----|-------|------|-------|
| <i>Bipolar disorder</i>                  |    |       |      |       |     |       |      |       |
| MR Egger                                 | 67 | -0.16 | 0.85 | 0.338 | 187 | 0.11  | 1.12 | 0.219 |
| Simple mode                              | 67 | -0.07 | 0.93 | 0.472 | 187 | -0.04 | 0.96 | 0.633 |
| Weighted median                          | 67 | -0.03 | 0.97 | 0.502 | 187 | -0.04 | 0.96 | 0.116 |
| Weighted mode                            | 67 | -0.07 | 0.94 | 0.481 | 187 | -0.04 | 0.96 | 0.646 |
| <i>Intelligence</i>                      |    |       |      |       |     |       |      |       |
| MR Egger                                 | 80 | -0.03 | -    | 0.654 | 487 | -0.05 | 0.95 | 0.796 |
| Simple mode                              | 80 | -0.03 | -    | 0.408 | 487 | -0.54 | 0.58 | 0.005 |
| Weighted median                          | 80 | 0.00  | -    | 0.750 | 487 | -0.10 | 0.91 | 0.033 |
| Weighted mode                            | 80 | -0.01 | -    | 0.712 | 487 | -0.55 | 0.58 | 0.003 |
| <i>Depression</i>                        |    |       |      |       |     |       |      |       |
| MR Egger                                 | 66 | 0.00  | 1.00 | 0.986 | 174 | -0.10 | 0.91 | 0.679 |
| Simple mode                              | 66 | -0.04 | 0.96 | 0.347 | 174 | -0.13 | 0.88 | 0.429 |
| Weighted median                          | 66 | -0.01 | 0.99 | 0.551 | 174 | -0.11 | 0.89 | 0.027 |
| Weighted mode                            | 66 | -0.03 | 0.97 | 0.413 | 174 | -0.13 | 0.88 | 0.359 |
| <i>Obsessive-compulsive disorder</i>     |    |       |      |       |     |       |      |       |
| MR Egger                                 | 67 | 0.49  | 1.63 | 0.213 | 7   | 0.05  | 1.06 | 0.611 |
| Simple mode                              | 67 | -0.14 | 0.87 | 0.636 | 7   | -0.07 | 0.93 | 0.204 |
| Weighted median                          | 67 | -0.12 | 0.89 | 0.339 | 7   | -0.04 | 0.96 | 0.222 |
| Weighted mode                            | 67 | -0.14 | 0.87 | 0.582 | 7   | -0.06 | 0.94 | 0.215 |
| <i>Schizophrenia</i>                     |    |       |      |       |     |       |      |       |
| MR Egger                                 | 67 | -0.14 | 0.87 | 0.471 | 489 | -0.08 | 0.92 | 0.136 |
| Simple mode                              | 67 | 0.08  | 1.09 | 0.381 | 489 | -0.09 | 0.92 | 0.199 |
| Weighted median                          | 67 | 0.02  | 1.02 | 0.626 | 489 | -0.01 | 0.99 | 0.354 |
| Weighted mode                            | 67 | 0.06  | 1.06 | 0.470 | 489 | -0.06 | 0.94 | 0.319 |
| <i>Suicide attempts</i>                  |    |       |      |       |     |       |      |       |
| MR Egger                                 | 65 | -0.02 | 0.98 | 0.896 | 29  | -0.10 | 0.91 | 0.491 |
| Simple mode                              | 65 | 0.00  | 1.00 | 0.955 | 29  | -0.07 | 0.93 | 0.464 |
| Weighted median                          | 65 | 0.01  | 1.01 | 0.894 | 29  | -0.05 | 0.95 | 0.287 |
| Weighted mode                            | 65 | 0.00  | 1.00 | 0.979 | 29  | -0.07 | 0.94 | 0.458 |
| <i>Tic-disorders (Tourette Syndrome)</i> |    |       |      |       |     |       |      |       |
| MR Egger                                 | 67 | 0.36  | 1.43 | 0.279 | 9   | -0.05 | 0.95 | 0.884 |
| Simple mode                              | 67 | 0.07  | 1.07 | 0.791 | 9   | -0.09 | 0.91 | 0.118 |
| Weighted median                          | 67 | 0.01  | 1.01 | 0.923 | 9   | -0.05 | 0.95 | 0.170 |
| Weighted mode                            | 67 | -0.13 | 0.88 | 0.606 | 9   | -0.09 | 0.91 | 0.177 |

**Supplement References**

1. Bowden J, Davey Smith G, Burgess S. Mendelian randomization with invalid instruments: effect estimation and bias detection through Egger regression. *Int J Epidemiol*. 2015;44(2):512-25.
